# Supplementary material
Source: publisher figshare collection journal article supplement (https://sage.figshare.com/ndownloader/files/24449271)
Supplement: Supplementary file 1 [file 24449271]

clear all
	 set more off
	 pause on
	 
********************************* 

cd "~/Dropbox/Gender Conflict Experiment/JCR 2020 Materials/JCR replication"
use "Manekin_Wood_JCR_Indonesiaexperiment.dta"

*****************************************
* treatment assignment:
*****************************************
gen women=.
replace women=1 if fl_11_do=="Female" 
replace women=0 if fl_11_do=="Male" 

lab define women 0 "men" 1 "women", modify
lab val women women
tab women


gen men=.
replace men=1 if women==0
replace men=0 if women==1
lab define men 0 "women" 1 "men", modify
lab val men men
tab men


*****************************************
* covariates:
*****************************************

* age
lab var q3 age
lab def age 1 "18-24" 2 "25-34" 3 "35-44" 4 "45-54" 5 "55-64" 6 "65 and over", modify
lab val q3 age
tab q3
tab q3, gen (age)


* gender 
tab q4
ren q4 female
recode female (1=0)(2=1)
lab def female 0 "Male" 1 "Female", modify
lab val female female   
lab var female female 
tab female


* education
lab var q5 education 
lab define q5 1 "none" 2 "some elementary" 3 "graduated elementary" 4 "junior high/vocational" 5 "Some highschool (academy/diploma III" 6 "graduated high school" 7 "some college" 8 "BA degree" 9 "postgraduate", modify
lab val q5 q5
tab q5
tab q5, gen(EDUCATION)

* religion
tab q6
lab var q6 "religion"
lab define q6 1 "Muslim" 2 "Protestant" 3 "Catholic" 4 "Hindu" 5 "Buddhist" 6 "Confucianist" 7 "Other", modify 
lab val q6 q6
tab q6

tab q6, gen (RELIGION)

recode q6 (4 5 6 7 = 4), gen(q6b)
tab q6b, gen(religionb)


* Sharia (Islam)
tab q7
lab var q7 "Islamic law"
lab define q7 1 "Strongly agree" 2 "Somewhat agree" 3 "Somewhat disagree" 4 "Strongly disagree", modify
lab val q7 q7 
tab q7 

gen sharia=.
replace sharia=1 if q7==1 | q7==2
replace sharia=0 if q7==3 | q7==4

tab sharia 

* Religiosity 
tab q8 
lab var q8 "religiosity"
lab define q8 1 "Several times a day" 2 "Once a day" 3 "Several times a week" 4 "Once a week" 5 "Once a month" 6 "Only when there are religious holidays" 7 "Never", modify
lab val q8 q8 
tab q8 

* International news consumption
tab q9
lab var q9 "international news consumption"
lab define q9 1 "Rarely/never" 2 "once or twice a week" 3 "Several times a week" 4 "Once or twice a day" 5 "More than twice a day", modify
lab val q9 q9 
tab q9


* income
tab q10
lab var q10 "income"
lab define q10 1 "<6.999.000 Rp" 2 "Rp 7.000.000-21.999.000" 3 "22.000.000-39.999.000" 4 "44.000.000-74.999.000" 5 ">75.000.000 Rp", modify
lab val q10 q10
tab q10

* rural/urban
tab q11
lab var q11 "urban"
lab define q11 1 "village" 2 "Small town (less than 100,000 residents)" 3 "city (more than 100,000 residents)" 4 "metropolis (more than 1 million residents)", modify 
lab val q11 q11
tab q11

* residence
lab var q12 residence 
tab q12

*****************************************
* manipulation/attention checks:
*****************************************

* do respondents get women/men
* ~89% of those exposed to women got it right. ~93% of those exposed to men got it right.

lab define q26 1 "woman" 2 "man" 3 "don't know/don't remember"
lab val q26 q26
tab women q26, row

*****************************************
* DV labels:
*****************************************

*  interest
tab q18
recode q18 (1=5) (2=4) (4=2) (5=1), gen(q18b)
lab def likely 1 "extremely unlikely" 2 "somewhat unlikely" 3 "neither likely nor unlikely" 4 "somewhat likely" 5 "extremely likely", modify
lab val q18b likely
tab q18b

* goals legitimate
tab q19
recode q19 (1=5) (2=4) (4=2) (5=1), gen(q19b)
lab def goals 1 "strongly believe groups goals are not legitimate" 2 "tend to believe groups goals are not legitimate" 3 "not sure whether goals are legitimate or not" 4 "tend to believe groups goals are legitimate" 5 "strongly believe groups goals are legitimate", modify
lab val q19b goals
tab q19b


* tactics legitimate
tab q20
recode q20 (1=5) (2=4) (4=2) (5=1), gen(q20b)
lab def tactics 1 "strongly believe groups tactics are not legitimate" 2 "tend to believe groups tactics are not legitimate" 3 "not sure whether tactics are legitimate or not" 4 "tend to believe groups tactics are legitimate" 5 "strongly believe groups tactics are legitimate", modify
lab val q20b tactics
tab q20b


* motivations

* motivation1 - lost family members in war
gen motivation1 = q24_1
replace motivation1 = q25_1 if q24_1==.
recode motivation1 (1=5) (2=4) (4=2) (5=1)
lab val motivation1 likely
tab motivation1


* motivation2 - strongly believes in cause of independence 
gen motivation2=q24_2
replace motivation2 = q25_2 if q24_2==.
recode motivation2 (1=5) (2=4) (4=2) (5=1)
lab val motivation2 likely
tab motivation2


* motivation3 - desire for thrill and adventure 

gen motivation3=q24_3
replace motivation3 = q25_3 if q24_3==.
recode motivation3 (1=5) (2=4) (4=2) (5=1)
lab val motivation3 likely
tab motivation3


* motivation4 - opportunity to profit 
gen motivation4=q24_4
replace motivation4 = q25_4 if q24_4==.
recode motivation4 (1=5) (2=4) (4=2) (5=1)
lab val motivation4 likely
tab motivation4


******************************************************
* Online Appendix Section 2.2: Descriptive statistics:
******************************************************

su age1 age2 age3 age4 age5 age6 female religionb1 religionb2 religionb3 religionb4 EDUCATION1 EDUCATION2 EDUCATION3 EDUCATION4 EDUCATION5 EDUCATION6 EDUCATION7 

********************************************
* Online Appendix Section 3.2: Balance check
********************************************

global controls  female q3 q5 RELIGION1 q10 q9 q11

su $controls

orth_out $controls, by (women) se compare test count


*****************************************
* Analysis: Table 1
*****************************************

* interest in group

ttest q18b, by(men) une

* Legitimacy of goals 

ttest q19b, by(men) une

* Legitimacy of tactics  

ttest q20b, by(men) une

*****************************************
* Analysis: Table 2	
*****************************************

* Ideological commitment 

ttest motivation2, by(men) une 

* thrill and adventure 

ttest motivation3, by(men) une 

* profit seeking

ttest motivation4, by(men) une  

***********************************************************************
* Online Appendix Section 4: Heterogeneous Effects by Respondent Gender
***********************************************************************

*** table 7

* Interest in group 

ttest q18b if female==1, by(men) une
ttest q18b if female==0, by(men) une

* Legitimacy of goals

ttest q19b if female==1, by(men) une
ttest q19b if female==0, by(men) une

* Legitimacy of tactics 

ttest q20b if female==1, by(men) une
ttest q20b if female==0, by(men) une

*** table 8

* Ideological commitment

ttest motivation2 if female==1, by(men) une
ttest motivation2 if female==0, by(men) une

* Thrill and adventure 

ttest motivation3 if female==1, by(men) une
ttest motivation3 if female==0, by(men) une

* Profit seeking

ttest motivation4 if female==1, by(men) une
ttest motivation4 if female==0, by(men) une


clear
